# Supplementary material
Source: PubMed Central journal article supplement (PMC2744609)
Supplement: jn.109.112268_1.pdf [file jn.109.112268_1.pdf]

ONLINE SUPPLEMENTAL MATERIAL

**SUPPLEMENTAL TABLE 1.** Composition of multi-vitamin, multi-mineral supplement <sup>1</sup>

| Nutrient                    | Quantity  |
|-----------------------------|-----------|
|                             | <i>μg</i> |
| vitamin A palmitate         | 400       |
| folic acid                  | 100       |
| cyanocobalamin              | 1         |
| cholecalciferol             | 100       |
| potassium iodide            | 75        |
| seleno-l-methionine complex | 25        |
|                             | <i>mg</i> |
| thiamin mononitrate         | 0.6       |
| riboflavin                  | 0.6       |
| niacinamide                 | 6.0       |
| pyroxidine                  | 0.9       |
| ascorbic acid               | 30.0      |
| d,l- $\alpha$ -tocopherol   | <4        |
| ferrous fumarate            | 5.0       |
| zinc gluconate              | 7.0       |
| copper gluconate            | 0.8       |

<sup>1</sup>All participants enrolled in the study received this supplement once daily. Capsules were manufactured specifically for this study by Tishcon Corporation (Westbury, NY) in 2 equal batches, with all ingredients from the same sources, and packed by Pharmasource Healthcare Inc (Marlboro, Mass). The manufacturer's certified ingredient concentrations were confirmed by the study investigators.

ONLINE SUPPLEMENTAL MATERIAL

**SUPPLEMENTAL TABLE 2.** Day to day variation in cytokine produced in whole blood in response to 24 h LPS treatment in elderly nursing home resident at baseline<sup>1</sup>

| Cytokine (LPS, mg/L) | Protein         |
|----------------------|-----------------|
| IL-1 $\beta$         | <i>ng/L</i>     |
| 1.0                  | 114 $\pm$ 119   |
| 0.01                 | 83 $\pm$ 96     |
| IL-6                 |                 |
| 1.0                  | 1667 $\pm$ 1508 |
| 0.01                 | 1317 $\pm$ 1416 |
| TNF $\alpha$         |                 |
| 1.0                  | 374 $\pm$ 530   |
| 0.01                 | 172 $\pm$ 436   |

<sup>1</sup>Day to day variation is the difference in cytokine production from two measurements taken at baseline. Data are presented as unadjusted means  $\pm$  SD.

ONLINE SUPPLEMENTAL MATERIAL

**SUPPLEMENTAL TABLE 3.** Description of SNP, primers and probes

| Gene         | SNP      | dsSNP ID  | Gene position | Primers and Probes or ABI Assay by Demand ID                                                               |
|--------------|----------|-----------|---------------|------------------------------------------------------------------------------------------------------------|
| IL-1 $\beta$ | -511G>A  | rs16944   | 5'-flanking   | Forward: GAGGCTCCTGCAATTGACAGA<br>Reverse : AGGGTGTGGGTCTCTACCTT<br>Probe: CTGTTCTCTGCCTC[G/A]GGA          |
| IL-1 $\beta$ | 3954C>T  | rs1143634 | Exon 5        | Forward: ACCTAAACAACATGTGCTCCACA<br>Reverse: ATCGTGCACATAAGCCTCGTTA<br>Probe: CATGTGTC[G/A]AAGAAGA         |
| IL-1 $\beta$ | -1473G>C | rs1143623 | 5'-flanking   | C_1839941                                                                                                  |
| IL-1 $\beta$ | 6054G>A  | rs1143643 | Intron 6      | Forward: GAGCCAGACTCCTGAGTTGTAACCTG<br>Reverse: CCTCAGCATTGTCCTAAGTTTTC<br>Probe: CACAC[G/A]GAAAGTT        |
| IL-6         | -174C>G  | rs1800795 | 5'-flanking   | Forward: GACGACCTA AGCTGCACTTTTC<br>Reverse: GGGCTGATTGG AACCTTATTA AGATTG<br>Probe: CTTTAGCAT[G/C]GCAAGAC |
| TNF $\alpha$ | -308G>A  | rs1800629 | 5'-flanking   | C_7514879_10                                                                                               |
